# Supplementary material for: Identification and Functional Verification Reveals that miR-195 Inhibiting THRSP to Affect Fat Deposition in Xinyang Buffalo
Source: Front Genet. 2021 Dec 22;12:736441. doi: 10.3389/fgene.2021.736441 (PMC8727870; doi:10.3389/fgene.2021.736441)
Supplement: Supplementary file 6 [file Table5.XLSX]

## Sheet: sheet 1
Table S5 Functional enrichment analysis for target genes of miRNAs
Category	ID	Term	Count	%	PValue	Genes	List Total	Pop Hits	Pop Total	Fold Enrichment	Bonferroni	Benjamini	FDR
KEGG	bta01100	Metabolic pathways	62	14.5199	4.98286e-06	ENSBTAG00000010709, ENSBTAG00000024240, ENSBTAG00000004688, ENSBTAG00000016465, ENSBTAG00000015038, ENSBTAG00000030335, ENSBTAG00000007689, ENSBTAG00000012251, ENSBTAG00000003196, ENSBTAG00000017592, ENSBTAG00000010284, ENSBTAG00000001908, ENSBTAG00000020873, ENSBTAG00000025496, ENSBTAG00000012519, ENSBTAG00000018261, ENSBTAG00000014252, ENSBTAG00000004064, ENSBTAG00000002827, ENSBTAG00000019625,…	216	1235	7550	1.75476	0.00114043	0.000285229	0.0063836
KEGG	bta04151	PI3K-Akt signaling pathway	24	5.62061	0.000127812	ENSBTAG00000003043, ENSBTAG00000003362, ENSBTAG00000001936, ENSBTAG00000009232, ENSBTAG00000016525, ENSBTAG00000000507, ENSBTAG00000017266, ENSBTAG00000006909, ENSBTAG00000001335, ENSBTAG00000000754, ENSBTAG00000011082, ENSBTAG00000025035, ENSBTAG00000006161, ENSBTAG00000002006, ENSBTAG00000016915, ENSBTAG00000005339, ENSBTAG00000004269, ENSBTAG00000020277, ENSBTAG00000009498, ENSBTAG00000000782,…	216	347	7550	2.41755	0.0288466	0.00417282	0.163623
KEGG	bta01130	Biosynthesis of antibiotics	23	5.38642	7.60622e-08	ENSBTAG00000010709, ENSBTAG00000024240, ENSBTAG00000001936, ENSBTAG00000021724, ENSBTAG00000010672, ENSBTAG00000015038, ENSBTAG00000003196, ENSBTAG00000019246, ENSBTAG00000001908, ENSBTAG00000007840, ENSBTAG00000006759, ENSBTAG00000006227, ENSBTAG00000008683, ENSBTAG00000000555, ENSBTAG00000001992, ENSBTAG00000005976, ENSBTAG00000009733, ENSBTAG00000006463, ENSBTAG00000016007, ENSBTAG00000004064,…	216	206	7550	3.9026	1.74181e-05	1.74181e-05	9.7447e-05
KEGG	bta05200	Pathways in cancer	23	5.38642	0.0020759	ENSBTAG00000003043, ENSBTAG00000005299, ENSBTAG00000008403, ENSBTAG00000003362, ENSBTAG00000009232, ENSBTAG00000017266, ENSBTAG00000019230, ENSBTAG00000006909, ENSBTAG00000011849, ENSBTAG00000000988, ENSBTAG00000001333, ENSBTAG00000011082, ENSBTAG00000006161, ENSBTAG00000020935, ENSBTAG00000011266, ENSBTAG00000005339, ENSBTAG00000009498, ENSBTAG00000011412, ENSBTAG00000016683, ENSBTAG00000005691,…	216	398	7550	2.01994	0.378658	0.0359438	2.62717
KEGG	bta04510	Focal adhesion	17	3.98126	0.000277874	ENSBTAG00000008403, ENSBTAG00000009232, ENSBTAG00000016525, ENSBTAG00000017266, ENSBTAG00000006909, ENSBTAG00000011082, ENSBTAG00000011198, ENSBTAG00000031575, ENSBTAG00000006161, ENSBTAG00000002006, ENSBTAG00000005339, ENSBTAG00000016915, ENSBTAG00000009498, ENSBTAG00000020791, ENSBTAG00000000782, ENSBTAG00000011412, ENSBTAG00000027024	216	208	7550	2.85679	0.061659	0.00704638	0.355414
KEGG	bta01200	Carbon metabolism	14	3.27869	1.17894e-05	ENSBTAG00000006227, ENSBTAG00000010709, ENSBTAG00000024240, ENSBTAG00000015038, ENSBTAG00000010672, ENSBTAG00000021724, ENSBTAG00000000555, ENSBTAG00000006463, ENSBTAG00000009733, ENSBTAG00000016007, ENSBTAG00000001908, ENSBTAG00000002827, ENSBTAG00000019625, ENSBTAG00000006759	216	109	7550	4.48947	0.00269614	0.00053981	0.0151029
KEGG	bta05205	Proteoglycans in cancer	14	3.27869	0.00517377	ENSBTAG00000018423, ENSBTAG00000008403, ENSBTAG00000009232, ENSBTAG00000006909, ENSBTAG00000011082, ENSBTAG00000011198, ENSBTAG00000020935, ENSBTAG00000006161, ENSBTAG00000002006, ENSBTAG00000005339, ENSBTAG00000011905, ENSBTAG00000000782, ENSBTAG00000005691, ENSBTAG00000002313	216	203	7550	2.4106	0.69513	0.0606052	6.42958
KEGG	bta03320	PPAR signaling pathway	12	2.8103	3.82448e-06	ENSBTAG00000024240, ENSBTAG00000004178, ENSBTAG00000001936, ENSBTAG00000012855, ENSBTAG00000006707, ENSBTAG00000001333, ENSBTAG00000032436, ENSBTAG00000004647, ENSBTAG00000016801, ENSBTAG00000010579, ENSBTAG00000019625, ENSBTAG00000003746	216	70	7550	5.99206	0.000875423	0.000291893	0.00489962
KEGG	bta04152	AMPK signaling pathway	12	2.8103	0.000589857	ENSBTAG00000020277, ENSBTAG00000006752, ENSBTAG00000001936, ENSBTAG00000009050, ENSBTAG00000009232, ENSBTAG00000008401, ENSBTAG00000006909, ENSBTAG00000001333, ENSBTAG00000009733, ENSBTAG00000000754, ENSBTAG00000011082, ENSBTAG00000007840	216	120	7550	3.49537	0.126386	0.0111966	0.753069
KEGG	bta05206	MicroRNAs in cancer	12	2.8103	0.0971856	ENSBTAG00000005339, ENSBTAG00000019692, ENSBTAG00000008403, ENSBTAG00000009498, ENSBTAG00000025424, ENSBTAG00000010906, ENSBTAG00000000163, ENSBTAG00000013761, ENSBTAG00000014127, ENSBTAG00000006161, ENSBTAG00000006255, ENSBTAG00000002006	216	248	7550	1.69131	1	0.427328	73.0133
KEGG	bta05016	Huntington's disease	11	2.57611	0.0578014	ENSBTAG00000013208, ENSBTAG00000018188, ENSBTAG00000016208, ENSBTAG00000005096, ENSBTAG00000001333, ENSBTAG00000011849, ENSBTAG00000002944, ENSBTAG00000021976, ENSBTAG00000000605, ENSBTAG00000004647, ENSBTAG00000013113	216	199	7550	1.93211	0.999999	0.330359	53.3635
KEGG	bta04810	Regulation of actin cytoskeleton	11	2.57611	0.0808857	ENSBTAG00000016098, ENSBTAG00000004242, ENSBTAG00000011905, ENSBTAG00000008403, ENSBTAG00000009232, ENSBTAG00000016525, ENSBTAG00000017266, ENSBTAG00000006909, ENSBTAG00000011198, ENSBTAG00000005691, ENSBTAG00000031575	216	212	7550	1.81364	1	0.406683	66.0603
KEGG	bta04015	Rap1 signaling pathway	11	2.57611	0.084508	ENSBTAG00000005339, ENSBTAG00000016915, ENSBTAG00000009232, ENSBTAG00000020791, ENSBTAG00000016169, ENSBTAG00000000782, ENSBTAG00000006909, ENSBTAG00000011082, ENSBTAG00000005691, ENSBTAG00000006161, ENSBTAG00000002006	216	214	7550	1.79669	1	0.404553	67.7346
KEGG	bta04910	Insulin signaling pathway	10	2.34192	0.0153778	ENSBTAG00000014958, ENSBTAG00000001936, ENSBTAG00000009232, ENSBTAG00000020791, ENSBTAG00000004806, ENSBTAG00000006909, ENSBTAG00000009733, ENSBTAG00000005218, ENSBTAG00000011198, ENSBTAG00000014831	216	136	7550	2.57013	0.971243	0.155486	18.0076
KEGG	bta00640	Propanoate metabolism	9	2.10773	3.81351e-07	ENSBTAG00000008683, ENSBTAG00000024240, ENSBTAG00000015038, ENSBTAG00000010672, ENSBTAG00000003887, ENSBTAG00000018694, ENSBTAG00000002827, ENSBTAG00000019625, ENSBTAG00000006759	216	26	7550	12.0994	8.73256e-05	4.36638e-05	0.000488567
KEGG	bta04146	Peroxisome	9	2.10773	0.00258047	ENSBTAG00000012519, ENSBTAG00000004178, ENSBTAG00000006707, ENSBTAG00000009061, ENSBTAG00000016313, ENSBTAG00000003718, ENSBTAG00000019625, ENSBTAG00000008648, ENSBTAG00000003746	216	84	7550	3.74504	0.446609	0.0386782	3.25605
KEGG	bta05222	Small cell lung cancer	9	2.10773	0.00321648	ENSBTAG00000009498, ENSBTAG00000009232, ENSBTAG00000017266, ENSBTAG00000011412, ENSBTAG00000006909, ENSBTAG00000016683, ENSBTAG00000006640, ENSBTAG00000014127, ENSBTAG00000016801	216	87	7550	3.6159	0.521817	0.0450631	4.04342
KEGG	bta04071	Sphingolipid signaling pathway	9	2.10773	0.0209135	ENSBTAG00000020277, ENSBTAG00000008403, ENSBTAG00000009498, ENSBTAG00000009232, ENSBTAG00000011461, ENSBTAG00000006909, ENSBTAG00000014252, ENSBTAG00000009984, ENSBTAG00000000754	216	120	7550	2.62153	0.992093	0.176012	23.7211
KEGG	bta04022	cGMP-PKG signaling pathway	9	2.10773	0.0837062	ENSBTAG00000013208, ENSBTAG00000005299, ENSBTAG00000008403, ENSBTAG00000034366, ENSBTAG00000011461, ENSBTAG00000005218, ENSBTAG00000011198, ENSBTAG00000002313, ENSBTAG00000013113	216	159	7550	1.97851	1	0.409514	67.3706
KEGG	bta00020	Citrate cycle (TCA cycle)	8	1.87354	1.60453e-05	ENSBTAG00000006227, ENSBTAG00000010709, ENSBTAG00000001936, ENSBTAG00000021724, ENSBTAG00000000555, ENSBTAG00000006463, ENSBTAG00000001908, ENSBTAG00000006759	216	30	7550	9.32099	0.00366765	0.000612211	0.0205544
KEGG	bta00071	Fatty acid degradation	8	1.87354	0.000135757	ENSBTAG00000003072, ENSBTAG00000024240, ENSBTAG00000006707, ENSBTAG00000015038, ENSBTAG00000016007, ENSBTAG00000002827, ENSBTAG00000010579, ENSBTAG00000019625	216	41	7550	6.82023	0.0306122	0.00387878	0.173786
KEGG	bta01212	Fatty acid metabolism	8	1.87354	0.000375485	ENSBTAG00000003072, ENSBTAG00000024240, ENSBTAG00000006707, ENSBTAG00000015038, ENSBTAG00000010564, ENSBTAG00000002827, ENSBTAG00000010579, ENSBTAG00000019625	216	48	7550	5.82562	0.0824079	0.00856335	0.479988
KEGG	bta00280	Valine, leucine and isoleucine degradation	8	1.87354	0.000485409	ENSBTAG00000024240, ENSBTAG00000033186, ENSBTAG00000015038, ENSBTAG00000010672, ENSBTAG00000001908, ENSBTAG00000002827, ENSBTAG00000019625, ENSBTAG00000044160	216	50	7550	5.59259	0.105227	0.0100569	0.620102
KEGG	bta04066	HIF-1 signaling pathway	8	1.87354	0.0193245	ENSBTAG00000005339, ENSBTAG00000016915, ENSBTAG00000009232, ENSBTAG00000008401, ENSBTAG00000021724, ENSBTAG00000006909, ENSBTAG00000011082, ENSBTAG00000020935	216	96	7550	2.91281	0.988537	0.17658	22.1199
KEGG	bta00564	Glycerophospholipid metabolism	8	1.87354	0.0203416	ENSBTAG00000007689, ENSBTAG00000016296, ENSBTAG00000009770, ENSBTAG00000005730, ENSBTAG00000017592, ENSBTAG00000010284, ENSBTAG00000008293, ENSBTAG00000020456	216	97	7550	2.88278	0.990961	0.178065	23.1484
KEGG	bta04923	Regulation of lipolysis in adipocytes	7	1.63934	0.00450246	ENSBTAG00000009232, ENSBTAG00000019230, ENSBTAG00000011461, ENSBTAG00000008416, ENSBTAG00000006909, ENSBTAG00000005218, ENSBTAG00000014127	216	55	7550	4.44865	0.644202	0.0557938	5.61741
KEGG	bta00010	Glycolysis / Gluconeogenesis	7	1.63934	0.00874826	ENSBTAG00000008683, ENSBTAG00000010709, ENSBTAG00000001936, ENSBTAG00000021724, ENSBTAG00000009733, ENSBTAG00000016007, ENSBTAG00000001908	216	63	7550	3.88374	0.866301	0.0957128	10.6467
KEGG	bta05218	Melanoma	7	1.63934	0.0163069	ENSBTAG00000009498, ENSBTAG00000009232, ENSBTAG00000006909, ENSBTAG00000011082, ENSBTAG00000005691, ENSBTAG00000006640, ENSBTAG00000006161	216	72	7550	3.39828	0.976834	0.157296	18.9933
KEGG	bta05215	Prostate cancer	7	1.63934	0.0354809	ENSBTAG00000009498, ENSBTAG00000003362, ENSBTAG00000009232, ENSBTAG00000006909, ENSBTAG00000016683, ENSBTAG00000011082, ENSBTAG00000006640	216	86	7550	2.84507	0.999745	0.255808	37.0497
KEGG	bta03015	mRNA surveillance pathway	7	1.63934	0.040926	ENSBTAG00000020277, ENSBTAG00000026995, ENSBTAG00000011415, ENSBTAG00000020735, ENSBTAG00000015277, ENSBTAG00000000754, ENSBTAG00000011198	216	89	7550	2.74917	0.99993	0.265588	41.4538
KEGG	bta04915	Estrogen signaling pathway	7	1.63934	0.0603049	ENSBTAG00000013162, ENSBTAG00000025441, ENSBTAG00000003362, ENSBTAG00000009232, ENSBTAG00000006909, ENSBTAG00000047502, ENSBTAG00000002313	216	98	7550	2.49669	0.999999	0.334332	54.9264
KEGG	bta04931	Insulin resistance	7	1.63934	0.0964987	ENSBTAG00000001936, ENSBTAG00000009498, ENSBTAG00000009232, ENSBTAG00000006909, ENSBTAG00000016683, ENSBTAG00000011198, ENSBTAG00000014831	216	111	7550	2.20429	1	0.432656	72.749
KEGG	bta00620	Pyruvate metabolism	6	1.40515	0.0041716	ENSBTAG00000008683, ENSBTAG00000010709, ENSBTAG00000001936, ENSBTAG00000021724, ENSBTAG00000001908, ENSBTAG00000002827	216	38	7550	5.51901	0.61607	0.0547553	5.21473
KEGG	bta05230	Central carbon metabolism in cancer	6	1.40515	0.03113	ENSBTAG00000009498, ENSBTAG00000009232, ENSBTAG00000021724, ENSBTAG00000006909, ENSBTAG00000006161, ENSBTAG00000020935	216	62	7550	3.38262	0.999284	0.243114	33.3131
KEGG	bta05211	Renal cell carcinoma	6	1.40515	0.0392882	ENSBTAG00000005339, ENSBTAG00000009232, ENSBTAG00000020791, ENSBTAG00000006909, ENSBTAG00000006161, ENSBTAG00000020935	216	66	7550	3.17761	0.999897	0.263577	40.16
KEGG	bta00100	Steroid biosynthesis	5	1.17096	0.00216396	ENSBTAG00000004688, ENSBTAG00000016465, ENSBTAG00000001992, ENSBTAG00000005976, ENSBTAG00000019246	216	20	7550	8.73843	0.39109	0.0348141	2.73721
KEGG	bta00310	Lysine degradation	5	1.17096	0.0670195	ENSBTAG00000015038, ENSBTAG00000006463, ENSBTAG00000007331, ENSBTAG00000002827, ENSBTAG00000019625	216	54	7550	3.23645	1	0.356785	58.8829
KEGG	bta04370	VEGF signaling pathway	5	1.17096	0.0866384	ENSBTAG00000005339, ENSBTAG00000009232, ENSBTAG00000000782, ENSBTAG00000006909, ENSBTAG00000014127	216	59	7550	2.96218	1	0.404777	68.6834
KEGG	bta04150	mTOR signaling pathway	5	1.17096	0.0866384	ENSBTAG00000009498, ENSBTAG00000009232, ENSBTAG00000006909, ENSBTAG00000011082, ENSBTAG00000000163	216	59	7550	2.96218	1	0.404777	68.6834
KEGG	bta00630	Glyoxylate and dicarboxylate metabolism	4	0.936768	0.036569	ENSBTAG00000010672, ENSBTAG00000000555, ENSBTAG00000001908, ENSBTAG00000002827	216	26	7550	5.37749	0.999803	0.254859	37.9534
KEGG	bta00650	Butanoate metabolism	4	0.936768	0.0442191	ENSBTAG00000033186, ENSBTAG00000015038, ENSBTAG00000002827, ENSBTAG00000019625	216	28	7550	4.99339	0.999968	0.276499	43.9777
KEGG	bta00051	Fructose and mannose metabolism	4	0.936768	0.0570547	ENSBTAG00000006752, ENSBTAG00000008401, ENSBTAG00000009733, ENSBTAG00000025496	216	31	7550	4.51016	0.999999	0.334801	52.8877
KEGG	bta04960	Aldosterone-regulated sodium reabsorption	4	0.936768	0.0986014	ENSBTAG00000004269, ENSBTAG00000009232, ENSBTAG00000006909, ENSBTAG00000011082	216	39	7550	3.585	1	0.424684	73.5505
KEGG	bta00920	Sulfur metabolism	3	0.702576	0.0312452	ENSBTAG00000003196, ENSBTAG00000006160, ENSBTAG00000004064	216	10	7550	10.4861	0.999303	0.236036	33.4146
BP	GO:0030199	collagen fibril organization	8	2.03562	6.17726e-06	ENSBTAG00000018563, ENSBTAG00000013472, ENSBTAG00000013103, ENSBTAG00000014665, ENSBTAG00000014912, ENSBTAG00000012994, ENSBTAG00000021466, ENSBTAG00000001745	352	29	13824	10.8339	0.00846392	0.00846392	0.0101561
BP	GO:0030574	collagen catabolic process	6	1.52672	7.01432e-06	ENSBTAG00000017135, ENSBTAG00000012442, ENSBTAG00000014665, ENSBTAG00000014824, ENSBTAG00000015739, ENSBTAG00000019267	352	12	13824	19.6364	0.0096053	0.00481424	0.0115323
BP	GO:0006412	translation	16	4.07125	3.28512e-05	ENSBTAG00000005296, ENSBTAG00000003229, ENSBTAG00000000797, ENSBTAG00000047418, ENSBTAG00000038896, ENSBTAG00000007454, ENSBTAG00000018800, ENSBTAG00000046394, ENSBTAG00000012044, ENSBTAG00000019463, ENSBTAG00000018723, ENSBTAG00000019147, ENSBTAG00000008528, ENSBTAG00000019718, ENSBTAG00000015831, ENSBTAG00000007737	352	172	13824	3.65328	0.0441975	0.014955	0.054
BP	GO:0035987	endodermal cell differentiation	7	1.78117	3.84454e-05	ENSBTAG00000025210, ENSBTAG00000011802, ENSBTAG00000013755, ENSBTAG00000014824, ENSBTAG00000013662, ENSBTAG00000008300, ENSBTAG00000019267	352	26	13824	10.5734	0.051527	0.0131384	0.0631929
BP	GO:0006508	proteolysis	16	4.07125	4.0195e-05	ENSBTAG00000046979, ENSBTAG00000018112, ENSBTAG00000015177, ENSBTAG00000010992, ENSBTAG00000019267, ENSBTAG00000010230, ENSBTAG00000002977, ENSBTAG00000005989, ENSBTAG00000016881, ENSBTAG00000020528, ENSBTAG00000008389, ENSBTAG00000004840, ENSBTAG00000009717, ENSBTAG00000011458, ENSBTAG00000046158, ENSBTAG00000007450	352	175	13824	3.59065	0.0538077	0.0110009	0.0660678
BP	GO:0070208	protein heterotrimerization	5	1.27226	4.65386e-05	ENSBTAG00000008074, ENSBTAG00000011802, ENSBTAG00000013472, ENSBTAG00000013103, ENSBTAG00000006276	352	9	13824	21.8182	0.0620312	0.0106163	0.0764909
BP	GO:0006956	complement activation	5	1.27226	4.65386e-05	ENSBTAG00000012467, ENSBTAG00000004840, ENSBTAG00000017280, ENSBTAG00000007450, ENSBTAG00000008612	352	9	13824	21.8182	0.0620312	0.0106163	0.0764909
BP	GO:0071230	cellular response to amino acid stimulus	8	2.03562	0.000109323	ENSBTAG00000011802, ENSBTAG00000013472, ENSBTAG00000013103, ENSBTAG00000007173, ENSBTAG00000004034, ENSBTAG00000013869, ENSBTAG00000021466, ENSBTAG00000019267	352	44	13824	7.1405	0.139668	0.0212617	0.179596
BP	GO:0007155	cell adhesion	15	3.81679	0.000134216	ENSBTAG00000011578, ENSBTAG00000012265, ENSBTAG00000030333, ENSBTAG00000011931, ENSBTAG00000014906, ENSBTAG00000000604, ENSBTAG00000009513, ENSBTAG00000023907, ENSBTAG00000001204, ENSBTAG00000010073, ENSBTAG00000018810, ENSBTAG00000013755, ENSBTAG00000008300, ENSBTAG00000010303, ENSBTAG00000010562	352	173	13824	3.40515	0.168641	0.0228223	0.220449
BP	GO:0042773	ATP synthesis coupled electron transport	4	1.01781	0.00030663	ENSBTAG00000043559, ENSBTAG00000043556, ENSBTAG00000043563, ENSBTAG00000043577	352	6	13824	26.1818	0.344258	0.0458053	0.502967
BP	GO:0006958	complement activation, classical pathway	5	1.27226	0.000583755	ENSBTAG00000004840, ENSBTAG00000017280, ENSBTAG00000007450, ENSBTAG00000011196, ENSBTAG00000007153	352	16	13824	12.2727	0.552232	0.0772049	0.955491
BP	GO:0010951	negative regulation of endopeptidase activity	7	1.78117	0.00372634	ENSBTAG00000010899, ENSBTAG00000018137, ENSBTAG00000014465, ENSBTAG00000009705, ENSBTAG00000016267, ENSBTAG00000017280, ENSBTAG00000013004	352	59	13824	4.65948	0.994125	0.373121	5.95367
BP	GO:0030335	positive regulation of cell migration	10	2.54453	0.00508032	ENSBTAG00000023907, ENSBTAG00000005021, ENSBTAG00000020342, ENSBTAG00000013103, ENSBTAG00000010138, ENSBTAG00000014824, ENSBTAG00000012771, ENSBTAG00000007173, ENSBTAG00000005077, ENSBTAG00000010992	352	127	13824	3.09234	0.999096	0.442352	8.03325
BP	GO:0098609	cell-cell adhesion	7	1.78117	0.00697279	ENSBTAG00000002068, ENSBTAG00000046394, ENSBTAG00000004855, ENSBTAG00000030587, ENSBTAG00000013918, ENSBTAG00000033080, ENSBTAG00000009048	352	67	13824	4.10312	0.999934	0.523186	10.8676
BP	GO:0016525	negative regulation of angiogenesis	6	1.52672	0.00717739	ENSBTAG00000025210, ENSBTAG00000008232, ENSBTAG00000018810, ENSBTAG00000014835, ENSBTAG00000009705, ENSBTAG00000003505	352	48	13824	4.90909	0.99995	0.507361	11.1691
BP	GO:0032720	negative regulation of tumor necrosis factor production	5	1.27226	0.00748019	ENSBTAG00000016864, ENSBTAG00000000604, ENSBTAG00000010562, ENSBTAG00000012500, ENSBTAG00000003166	352	31	13824	6.33431	0.999967	0.497803	11.6135
BP	GO:0071222	cellular response to lipopolysaccharide	7	1.78117	0.0086015	ENSBTAG00000014465, ENSBTAG00000008232, ENSBTAG00000016864, ENSBTAG00000024928, ENSBTAG00000013895, ENSBTAG00000012500, ENSBTAG00000003166	352	70	13824	3.92727	0.999993	0.524281	13.2411
BP	GO:0031638	zymogen activation	3	0.763359	0.00901224	ENSBTAG00000014824, ENSBTAG00000010992, ENSBTAG00000011100	352	6	13824	19.6364	0.999996	0.519423	13.8302
BP	GO:0010863	positive regulation of phospholipase C activity	3	0.763359	0.00901224	ENSBTAG00000015457, ENSBTAG00000002804, ENSBTAG00000007173	352	6	13824	19.6364	0.999996	0.519423	13.8302
BP	GO:0030198	extracellular matrix organization	7	1.78117	0.00920034	ENSBTAG00000023907, ENSBTAG00000005250, ENSBTAG00000007173, ENSBTAG00000009513, ENSBTAG00000021466, ENSBTAG00000010793, ENSBTAG00000012088	352	71	13824	3.87196	0.999997	0.506667	14.0987
BP	GO:1902600	hydrogen ion transmembrane transport	5	1.27226	0.00934999	ENSBTAG00000039555, ENSBTAG00000043550, ENSBTAG00000043561, ENSBTAG00000043560, ENSBTAG00000043556	352	33	13824	5.95041	0.999998	0.493546	14.3118
BP	GO:0006879	cellular iron ion homeostasis	5	1.27226	0.00934999	ENSBTAG00000007273, ENSBTAG00000018854, ENSBTAG00000011184, ENSBTAG00000019636, ENSBTAG00000011787	352	33	13824	5.95041	0.999998	0.493546	14.3118
BP	GO:0030324	lung development	6	1.52672	0.0108569	ENSBTAG00000003061, ENSBTAG00000003636, ENSBTAG00000014665, ENSBTAG00000014824, ENSBTAG00000007173, ENSBTAG00000012994	352	53	13824	4.44597	1	0.528124	16.4299
BP	GO:0051603	proteolysis involved in cellular protein catabolic process	5	1.27226	0.0115	ENSBTAG00000046979, ENSBTAG00000017135, ENSBTAG00000012442, ENSBTAG00000010992, ENSBTAG00000011100	352	35	13824	5.61039	1	0.531346	17.3188
BP	GO:0044342	type B pancreatic cell proliferation	3	0.763359	0.0124065	ENSBTAG00000003994, ENSBTAG00000009570, ENSBTAG00000008611	352	7	13824	16.8312	1	0.541972	18.5567
BP	GO:0001558	regulation of cell growth	5	1.27226	0.0126845	ENSBTAG00000008389, ENSBTAG00000003994, ENSBTAG00000010682, ENSBTAG00000021467, ENSBTAG00000008611	352	36	13824	5.45455	1	0.53407	18.9328
BP	GO:2001235	positive regulation of apoptotic signaling pathway	4	1.01781	0.015375	ENSBTAG00000008232, ENSBTAG00000008733, ENSBTAG00000010992, ENSBTAG00000011100	352	21	13824	7.48052	1	0.588666	22.4897
BP	GO:0043567	regulation of insulin-like growth factor receptor signaling pathway	3	0.763359	0.0162665	ENSBTAG00000003994, ENSBTAG00000021467, ENSBTAG00000008611	352	8	13824	14.7273	1	0.594515	23.6355
BP	GO:0070374	positive regulation of ERK1 and ERK2 cascade	9	2.29008	0.0178238	ENSBTAG00000011578, ENSBTAG00000018424, ENSBTAG00000015228, ENSBTAG00000019754, ENSBTAG00000012771, ENSBTAG00000002804, ENSBTAG00000020485, ENSBTAG00000007173, ENSBTAG00000010303	352	130	13824	2.71888	1	0.613954	25.599
BP	GO:0016485	protein processing	6	1.52672	0.0179115	ENSBTAG00000002977, ENSBTAG00000012237, ENSBTAG00000017135, ENSBTAG00000002939, ENSBTAG00000014665, ENSBTAG00000017863	352	60	13824	3.92727	1	0.601918	25.7082
BP	GO:0045766	positive regulation of angiogenesis	7	1.78117	0.0209685	ENSBTAG00000014465, ENSBTAG00000018563, ENSBTAG00000017280, ENSBTAG00000010992, ENSBTAG00000003806, ENSBTAG00000001826, ENSBTAG00000010562	352	85	13824	3.23422	1	0.647043	29.4204
BP	GO:0001525	angiogenesis	9	2.29008	0.0209831	ENSBTAG00000018424, ENSBTAG00000023907, ENSBTAG00000014465, ENSBTAG00000015457, ENSBTAG00000016881, ENSBTAG00000008300, ENSBTAG00000009513, ENSBTAG00000010793, ENSBTAG00000019267	352	134	13824	2.63772	1	0.634396	29.4376
BP	GO:0007566	embryo implantation	4	1.01781	0.0246835	ENSBTAG00000017851, ENSBTAG00000010682, ENSBTAG00000018854, ENSBTAG00000019267	352	25	13824	6.28364	1	0.682208	33.6972
BP	GO:0043433	negative regulation of sequence-specific DNA binding transcription factor activity	5	1.27226	0.0249777	ENSBTAG00000009863, ENSBTAG00000011190, ENSBTAG00000021187, ENSBTAG00000015366, ENSBTAG00000046671	352	44	13824	4.46281	1	0.674622	34.0252
BP	GO:0097067	cellular response to thyroid hormone stimulus	3	0.763359	0.0252818	ENSBTAG00000017135, ENSBTAG00000012442, ENSBTAG00000010992	352	10	13824	11.7818	1	0.667493	34.3627
BP	GO:0050680	negative regulation of epithelial cell proliferation	5	1.27226	0.0268831	ENSBTAG00000018563, ENSBTAG00000031184, ENSBTAG00000008232, ENSBTAG00000008733, ENSBTAG00000020407	352	45	13824	4.36364	1	0.678992	36.1134
BP	GO:0048846	axon extension involved in axon guidance	3	0.763359	0.0303886	ENSBTAG00000011824, ENSBTAG00000014912, ENSBTAG00000017746	352	11	13824	10.7107	1	0.713185	39.7939
BP	GO:0035385	Roundabout signaling pathway	3	0.763359	0.0303886	ENSBTAG00000011824, ENSBTAG00000014912, ENSBTAG00000017746	352	11	13824	10.7107	1	0.713185	39.7939
BP	GO:0010596	negative regulation of endothelial cell migration	3	0.763359	0.0303886	ENSBTAG00000008232, ENSBTAG00000018007, ENSBTAG00000003505	352	11	13824	10.7107	1	0.713185	39.7939
BP	GO:0048701	embryonic cranial skeleton morphogenesis	4	1.01781	0.0332604	ENSBTAG00000011284, ENSBTAG00000004570, ENSBTAG00000014824, ENSBTAG00000007173	352	28	13824	5.61039	1	0.735483	42.6597
BP	GO:0001568	blood vessel development	4	1.01781	0.0332604	ENSBTAG00000013472, ENSBTAG00000013103, ENSBTAG00000011640, ENSBTAG00000007808	352	28	13824	5.61039	1	0.735483	42.6597
BP	GO:1902230	negative regulation of intrinsic apoptotic signaling pathway in response to DNA damage	3	0.763359	0.0358641	ENSBTAG00000018424, ENSBTAG00000005574, ENSBTAG00000005077	352	12	13824	9.81818	1	0.752413	45.1468
BP	GO:0032868	response to insulin	4	1.01781	0.0364203	ENSBTAG00000013066, ENSBTAG00000003994, ENSBTAG00000004034, ENSBTAG00000015782	352	29	13824	5.41693	1	0.748351	45.6647
BP	GO:0030334	regulation of cell migration	5	1.27226	0.0376899	ENSBTAG00000003061, ENSBTAG00000014966, ENSBTAG00000011190, ENSBTAG00000017574, ENSBTAG00000001814	352	50	13824	3.92727	1	0.751213	46.83
BP	GO:0000122	negative regulation of transcription from RNA polymerase II promoter	18	4.58015	0.0399987	ENSBTAG00000018112, ENSBTAG00000031184, ENSBTAG00000008232, ENSBTAG00000017594, ENSBTAG00000018007, ENSBTAG00000016254, ENSBTAG00000018229, ENSBTAG00000008520, ENSBTAG00000046671, ENSBTAG00000009863, ENSBTAG00000017851, ENSBTAG00000015457, ENSBTAG00000009568, ENSBTAG00000019785, ENSBTAG00000013895, ENSBTAG00000043971, ENSBTAG00000021187, ENSBTAG00000012500	352	420	13824	1.68312	1	0.763128	48.8889
BP	GO:0060173	limb development	3	0.763359	0.0416866	ENSBTAG00000011284, ENSBTAG00000018007, ENSBTAG00000012500	352	13	13824	9.06294	1	0.768868	50.3466
BP	GO:0070527	platelet aggregation	4	1.01781	0.0431838	ENSBTAG00000011190, ENSBTAG00000016057, ENSBTAG00000011473, ENSBTAG00000007173	352	31	13824	5.06745	1	0.772707	51.6068
BP	GO:0043010	camera-type eye development	4	1.01781	0.0431838	ENSBTAG00000017851, ENSBTAG00000047362, ENSBTAG00000031184, ENSBTAG00000017448	352	31	13824	5.06745	1	0.772707	51.6068
BP	GO:0043410	positive regulation of MAPK cascade	5	1.27226	0.0452083	ENSBTAG00000013066, ENSBTAG00000024928, ENSBTAG00000003994, ENSBTAG00000006276, ENSBTAG00000008611	352	53	13824	3.70497	1	0.780331	53.2632
BP	GO:0048469	cell maturation	4	1.01781	0.0467841	ENSBTAG00000015457, ENSBTAG00000009570, ENSBTAG00000021187, ENSBTAG00000003166	352	32	13824	4.90909	1	0.784165	54.5153
BP	GO:0006952	defense response	3	0.763359	0.0478348	ENSBTAG00000015228, ENSBTAG00000004211, ENSBTAG00000015727	352	14	13824	8.41558	1	0.784088	55.3327
BP	GO:2000098	negative regulation of smooth muscle cell-matrix adhesion	2	0.508906	0.0501384	ENSBTAG00000014465, ENSBTAG00000023600	352	2	13824	39.2727	1	0.792555	57.0767
BP	GO:0001869	negative regulation of complement activation, lectin pathway	2	0.508906	0.0501384	ENSBTAG00000018137, ENSBTAG00000016267	352	2	13824	39.2727	1	0.792555	57.0767
BP	GO:0008360	regulation of cell shape	7	1.78117	0.051018	ENSBTAG00000014966, ENSBTAG00000001585, ENSBTAG00000012771, ENSBTAG00000018725, ENSBTAG00000003526, ENSBTAG00000008300, ENSBTAG00000019771	352	105	13824	2.61818	1	0.791206	57.7256
BP	GO:0072661	protein targeting to plasma membrane	3	0.763359	0.0542886	ENSBTAG00000009026, ENSBTAG00000019771, ENSBTAG00000016648	352	15	13824	7.85455	1	0.804883	60.0584
BP	GO:0046718	viral entry into host cell	3	0.763359	0.0542886	ENSBTAG00000016881, ENSBTAG00000012442, ENSBTAG00000003166	352	15	13824	7.85455	1	0.804883	60.0584
BP	GO:0001933	negative regulation of protein phosphorylation	4	1.01781	0.0584348	ENSBTAG00000021029, ENSBTAG00000013222, ENSBTAG00000011640, ENSBTAG00000003994	352	35	13824	4.48831	1	0.822017	62.8422
BP	GO:0045087	innate immune response	11	2.79898	0.0645425	ENSBTAG00000019953, ENSBTAG00000022007, ENSBTAG00000021071, ENSBTAG00000016864, ENSBTAG00000030913, ENSBTAG00000004840, ENSBTAG00000013895, ENSBTAG00000007450, ENSBTAG00000011196, ENSBTAG00000011698, ENSBTAG00000007153	352	227	13824	1.90308	1	0.846429	66.6128
BP	GO:0007160	cell-matrix adhesion	5	1.27226	0.0657557	ENSBTAG00000011931, ENSBTAG00000018169, ENSBTAG00000013755, ENSBTAG00000021466, ENSBTAG00000010562	352	60	13824	3.27273	1	0.846159	67.3177
BP	GO:0016337	single organismal cell-cell adhesion	5	1.27226	0.0657557	ENSBTAG00000018725, ENSBTAG00000010303, ENSBTAG00000007773, ENSBTAG00000010793, ENSBTAG00000010562	352	60	13824	3.27273	1	0.846159	67.3177
BP	GO:0034446	substrate adhesion-dependent cell spreading	4	1.01781	0.0668866	ENSBTAG00000003061, ENSBTAG00000008300, ENSBTAG00000007808, ENSBTAG00000003166	352	37	13824	4.2457	1	0.845539	67.9621
BP	GO:1902042	negative regulation of extrinsic apoptotic signaling pathway via death domain receptors	3	0.763359	0.0680364	ENSBTAG00000014465, ENSBTAG00000018563, ENSBTAG00000010303	352	17	13824	6.93048	1	0.845029	68.605
BP	GO:0010906	regulation of glucose metabolic process	3	0.763359	0.0680364	ENSBTAG00000003994, ENSBTAG00000006276, ENSBTAG00000008611	352	17	13824	6.93048	1	0.845029	68.605
BP	GO:0010830	regulation of myotube differentiation	2	0.508906	0.0742594	ENSBTAG00000013347, ENSBTAG00000008105	352	3	13824	26.1818	1	0.865108	71.8797
BP	GO:0038091	positive regulation of cell proliferation by VEGF-activated platelet derived growth factor receptor signaling pathway	2	0.508906	0.0742594	ENSBTAG00000002804, ENSBTAG00000007173	352	3	13824	26.1818	1	0.865108	71.8797
BP	GO:0006953	acute-phase response	3	0.763359	0.0752939	ENSBTAG00000016864, ENSBTAG00000019669, ENSBTAG00000008300	352	18	13824	6.54545	1	0.863942	72.3919
BP	GO:0002092	positive regulation of receptor internalization	3	0.763359	0.0752939	ENSBTAG00000011931, ENSBTAG00000020485, ENSBTAG00000015366	352	18	13824	6.54545	1	0.863942	72.3919
BP	GO:0001649	osteoblast differentiation	6	1.52672	0.0759326	ENSBTAG00000011802, ENSBTAG00000020342, ENSBTAG00000013103, ENSBTAG00000014906, ENSBTAG00000003994, ENSBTAG00000015739	352	89	13824	2.6476	1	0.861335	72.7038
BP	GO:0016477	cell migration	7	1.78117	0.0800629	ENSBTAG00000019569, ENSBTAG00000026676, ENSBTAG00000011931, ENSBTAG00000014824, ENSBTAG00000009655, ENSBTAG00000014357, ENSBTAG00000011698	352	118	13824	2.32974	1	0.871328	74.6421
BP	GO:0006869	lipid transport	4	1.01781	0.0805373	ENSBTAG00000016378, ENSBTAG00000016864, ENSBTAG00000010123, ENSBTAG00000038652	352	40	13824	3.92727	1	0.868265	74.8562
BP	GO:0007605	sensory perception of sound	6	1.52672	0.0817587	ENSBTAG00000018112, ENSBTAG00000013103, ENSBTAG00000015457, ENSBTAG00000018854, ENSBTAG00000002580, ENSBTAG00000046671	352	91	13824	2.58941	1	0.867815	75.3998
BP	GO:0018149	peptide cross-linking	3	0.763359	0.0904903	ENSBTAG00000007268, ENSBTAG00000008300, ENSBTAG00000021466	352	20	13824	5.89091	1	0.890528	78.9761
BP	GO:0050770	regulation of axonogenesis	3	0.763359	0.0904903	ENSBTAG00000011824, ENSBTAG00000014912, ENSBTAG00000017746	352	20	13824	5.89091	1	0.890528	78.9761
BP	GO:0051289	protein homotetramerization	4	1.01781	0.0952842	ENSBTAG00000017851, ENSBTAG00000009293, ENSBTAG00000022007, ENSBTAG00000043553	352	43	13824	3.65328	1	0.899381	80.7258
BP	GO:0010952	positive regulation of peptidase activity	2	0.508906	0.0977697	ENSBTAG00000009717, ENSBTAG00000010992	352	4	13824	19.6364	1	0.901807	81.5782
BP	GO:0010815	bradykinin catabolic process	2	0.508906	0.0977697	ENSBTAG00000002977, ENSBTAG00000010992	352	4	13824	19.6364	1	0.901807	81.5782
BP	GO:1900747	negative regulation of vascular endothelial growth factor signaling pathway	2	0.508906	0.0977697	ENSBTAG00000008232, ENSBTAG00000003505	352	4	13824	19.6364	1	0.901807	81.5782
BP	GO:2000427	positive regulation of apoptotic cell clearance	2	0.508906	0.0977697	ENSBTAG00000017280, ENSBTAG00000007450	352	4	13824	19.6364	1	0.901807	81.5782
BP	GO:0006955	immune response	10	2.54453	0.0977972	ENSBTAG00000019588, ENSBTAG00000002069, ENSBTAG00000017135, ENSBTAG00000024928, ENSBTAG00000037605, ENSBTAG00000020054, ENSBTAG00000004211, ENSBTAG00000005077, ENSBTAG00000011184, ENSBTAG00000010992	352	215	13824	1.82664	1	0.898131	81.5874
BP	GO:0006954	inflammatory response	10	2.54453	0.0977972	ENSBTAG00000019953, ENSBTAG00000003636, ENSBTAG00000024928, ENSBTAG00000020054, ENSBTAG00000013895, ENSBTAG00000004211, ENSBTAG00000017280, ENSBTAG00000005077, ENSBTAG00000003806, ENSBTAG00000003166	352	215	13824	1.82664	1	0.898131	81.5874
BP	GO:0048661	positive regulation of smooth muscle cell proliferation	3	0.763359	0.0983972	ENSBTAG00000002804, ENSBTAG00000043971, ENSBTAG00000021187	352	21	13824	5.61039	1	0.895894	81.7877
BP	GO:0045071	negative regulation of viral genome replication	3	0.763359	0.0983972	ENSBTAG00000030913, ENSBTAG00000015074, ENSBTAG00000021617	352	21	13824	5.61039	1	0.895894	81.7877
BP	GO:0048015	phosphatidylinositol-mediated signaling	3	0.763359	0.0983972	ENSBTAG00000012771, ENSBTAG00000002804, ENSBTAG00000007173	352	21	13824	5.61039	1	0.895894	81.7877
MF	GO:0005524	ATP binding	64	14.9883	8.44308e-07	ENSBTAG00000018423, ENSBTAG00000008403, ENSBTAG00000006970, ENSBTAG00000003362, ENSBTAG00000021301, ENSBTAG00000008401, ENSBTAG00000019854, ENSBTAG00000003196, ENSBTAG00000020873, ENSBTAG00000016265, ENSBTAG00000013162, ENSBTAG00000025441, ENSBTAG00000020661, ENSBTAG00000019759, ENSBTAG00000020735, ENSBTAG00000015683, ENSBTAG00000002829, ENSBTAG00000002086, ENSBTAG00000009232, ENSBTAG00000006937,…	363	1224	13095	1.88624	0.000449915	0.000449915	0.00122675
MF	GO:0044822	poly(A) RNA binding	49	11.4754	1.20482e-06	ENSBTAG00000018423, ENSBTAG00000011596, ENSBTAG00000018196, ENSBTAG00000017164, ENSBTAG00000003239, ENSBTAG00000016328, ENSBTAG00000002610, ENSBTAG00000007802, ENSBTAG00000001790, ENSBTAG00000021580, ENSBTAG00000006114, ENSBTAG00000009389, ENSBTAG00000011319, ENSBTAG00000013162, ENSBTAG00000006118, ENSBTAG00000011415, ENSBTAG00000014826, ENSBTAG00000020735, ENSBTAG00000004080, ENSBTAG00000016368,…	363	840	13095	2.10434	0.000641962	0.000321032	0.00175056
MF	GO:0051082	unfolded protein binding	8	1.87354	0.000417618	ENSBTAG00000013162, ENSBTAG00000016874, ENSBTAG00000003362, ENSBTAG00000019156, ENSBTAG00000021752, ENSBTAG00000014233, ENSBTAG00000016265, ENSBTAG00000002829	363	50	13095	5.7719	0.199595	0.0715254	0.605078
MF	GO:0009055	electron carrier activity	7	1.63934	0.00157606	ENSBTAG00000003072, ENSBTAG00000024240, ENSBTAG00000012519, ENSBTAG00000016679, ENSBTAG00000004178, ENSBTAG00000021976, ENSBTAG00000010579	363	46	13095	5.48958	0.568592	0.189558	2.26572
MF	GO:0016887	ATPase activity	10	2.34192	0.00233064	ENSBTAG00000006970, ENSBTAG00000020661, ENSBTAG00000006896, ENSBTAG00000019854, ENSBTAG00000006665, ENSBTAG00000003399, ENSBTAG00000017255, ENSBTAG00000000605, ENSBTAG00000004413, ENSBTAG00000001644	363	104	13095	3.46869	0.711679	0.220214	3.33349
MF	GO:0000166	nucleotide binding	17	3.98126	0.00527699	ENSBTAG00000011596, ENSBTAG00000005726, ENSBTAG00000008577, ENSBTAG00000017164, ENSBTAG00000008170, ENSBTAG00000016328, ENSBTAG00000001790, ENSBTAG00000009995, ENSBTAG00000021580, ENSBTAG00000013113, ENSBTAG00000009389, ENSBTAG00000011319, ENSBTAG00000014316, ENSBTAG00000006328, ENSBTAG00000014891, ENSBTAG00000010760, ENSBTAG00000004080	363	282	13095	2.1747	0.940399	0.375006	7.39958
MF	GO:0052890	oxidoreductase activity, acting on the CH-CH group of donors, with a flavin as acceptor	4	0.936768	0.00607871	ENSBTAG00000003072, ENSBTAG00000024240, ENSBTAG00000004178, ENSBTAG00000010579	363	14	13095	10.307	0.96122	0.371402	8.4781
MF	GO:0050660	flavin adenine dinucleotide binding	7	1.63934	0.00610065	ENSBTAG00000003072, ENSBTAG00000024240, ENSBTAG00000012519, ENSBTAG00000004688, ENSBTAG00000004178, ENSBTAG00000001908, ENSBTAG00000010579	363	60	13095	4.20868	0.961673	0.334822	8.50744
MF	GO:0034604	pyruvate dehydrogenase (NAD+) activity	3	0.702576	0.0106194	ENSBTAG00000018261, ENSBTAG00000021724, ENSBTAG00000001908	363	6	13095	18.0372	0.996622	0.468616	14.369
MF	GO:0003824	catalytic activity	7	1.63934	0.0184849	ENSBTAG00000021301, ENSBTAG00000006707, ENSBTAG00000004806, ENSBTAG00000016313, ENSBTAG00000003718, ENSBTAG00000018694, ENSBTAG00000019625	363	76	13095	3.32264	0.999952	0.630079	23.7456
MF	GO:0042803	protein homodimerization activity	13	3.0445	0.0226832	ENSBTAG00000005339, ENSBTAG00000019692, ENSBTAG00000004777, ENSBTAG00000016457, ENSBTAG00000019759, ENSBTAG00000000507, ENSBTAG00000016296, ENSBTAG00000046547, ENSBTAG00000016007, ENSBTAG00000007439, ENSBTAG00000008140, ENSBTAG00000018186, ENSBTAG00000008545	363	225	13095	2.0843	0.999995	0.67102	28.35
MF	GO:0001671	ATPase activator activity	3	0.702576	0.0296138	ENSBTAG00000035230, ENSBTAG00000016874, ENSBTAG00000020477	363	10	13095	10.8223	1	0.736899	35.3888
MF	GO:0000062	fatty-acyl-CoA binding	4	0.936768	0.0307185	ENSBTAG00000003072, ENSBTAG00000024240, ENSBTAG00000004178, ENSBTAG00000010579	363	25	13095	5.7719	1	0.721743	36.4493
MF	GO:0003995	acyl-CoA dehydrogenase activity	3	0.702576	0.048616	ENSBTAG00000024240, ENSBTAG00000004178, ENSBTAG00000010579	363	13	13095	8.32486	1	0.85004	51.5253
MF	GO:0051539	4 iron, 4 sulfur cluster binding	4	0.936768	0.05323	ENSBTAG00000000141, ENSBTAG00000016679, ENSBTAG00000000555, ENSBTAG00000021976	363	31	13095	4.65476	1	0.856818	54.8313
MF	GO:0055131	C3HC4-type RING finger domain binding	2	0.468384	0.0545261	ENSBTAG00000013162, ENSBTAG00000016265	363	2	13095	36.0744	1	0.845537	55.7215
MF	GO:0004222	metalloendopeptidase activity	7	1.63934	0.0586761	ENSBTAG00000002075, ENSBTAG00000019759, ENSBTAG00000003165, ENSBTAG00000013210, ENSBTAG00000016857, ENSBTAG00000002685, ENSBTAG00000000706	363	100	13095	2.52521	1	0.849809	58.463
MF	GO:0030170	pyridoxal phosphate binding	5	1.17096	0.0687194	ENSBTAG00000004118, ENSBTAG00000014252, ENSBTAG00000009984, ENSBTAG00000010284, ENSBTAG00000018186	363	56	13095	3.22093	1	0.878538	64.4576
MF	GO:0008201	heparin binding	7	1.63934	0.073453	ENSBTAG00000005339, ENSBTAG00000009844, ENSBTAG00000012855, ENSBTAG00000016857, ENSBTAG00000000706, ENSBTAG00000005691, ENSBTAG00000002006	363	106	13095	2.38227	1	0.882363	66.9941
MF	GO:0003730	mRNA 3'-UTR binding	4	0.936768	0.0765542	ENSBTAG00000016457, ENSBTAG00000005726, ENSBTAG00000001939, ENSBTAG00000009995	363	36	13095	4.00826	1	0.880267	68.5634
MF	GO:0042171	lysophosphatidic acid acyltransferase activity	2	0.468384	0.0806669	ENSBTAG00000008416, ENSBTAG00000020456	363	3	13095	24.0496	1	0.881721	70.5375
MF	GO:0042802	identical protein binding	8	1.87354	0.0807369	ENSBTAG00000008731, ENSBTAG00000030335, ENSBTAG00000001333, ENSBTAG00000009733, ENSBTAG00000001977, ENSBTAG00000010284, ENSBTAG00000011139, ENSBTAG00000000251	363	135	13095	2.13774	1	0.869909	70.5701
MF	GO:0016301	kinase activity	5	1.17096	0.0920707	ENSBTAG00000014958, ENSBTAG00000001936, ENSBTAG00000020735, ENSBTAG00000006909, ENSBTAG00000003439	363	62	13095	2.90922	1	0.893365	75.4243
MF	GO:0000287	magnesium ion binding	9	2.10773	0.0922187	ENSBTAG00000006227, ENSBTAG00000001936, ENSBTAG00000009498, ENSBTAG00000021592, ENSBTAG00000010906, ENSBTAG00000003718, ENSBTAG00000004064, ENSBTAG00000011798, ENSBTAG00000018186	363	167	13095	1.94413	1	0.883364	75.4825
MF	GO:0008408	3'-5' exonuclease activity	3	0.702576	0.0957205	ENSBTAG00000008170, ENSBTAG00000021592, ENSBTAG00000010760	363	19	13095	5.69595	1	0.88295	76.8214
CC	GO:0070062	extracellular exosome	89	20.8431	1.5065e-06	ENSBTAG00000016563, ENSBTAG00000018423, ENSBTAG00000008731, ENSBTAG00000006970, ENSBTAG00000002075, ENSBTAG00000003362, ENSBTAG00000008734, ENSBTAG00000021752, ENSBTAG00000012393, ENSBTAG00000020477, ENSBTAG00000016265, ENSBTAG00000002006, ENSBTAG00000025496, ENSBTAG00000013162, ENSBTAG00000002471, ENSBTAG00000004064, ENSBTAG00000015683, ENSBTAG00000001382, ENSBTAG00000002827, ENSBTAG00000007489,…	387	2162	15461	1.6446	0.00044432	0.00044432	0.00200796
CC	GO:0005783	endoplasmic reticulum	32	7.49415	2.82646e-06	ENSBTAG00000039442, ENSBTAG00000004688, ENSBTAG00000016465, ENSBTAG00000003362, ENSBTAG00000015554, ENSBTAG00000010265, ENSBTAG00000009995, ENSBTAG00000015195, ENSBTAG00000002006, ENSBTAG00000016265, ENSBTAG00000006665, ENSBTAG00000005730, ENSBTAG00000017713, ENSBTAG00000044194, ENSBTAG00000009984, ENSBTAG00000001977, ENSBTAG00000020456, ENSBTAG00000022161, ENSBTAG00000035230, ENSBTAG00000009292,…	387	497	15461	2.57229	0.000833461	0.000416817	0.00376726
CC	GO:0005739	mitochondrion	45	10.5386	1.05145e-05	ENSBTAG00000008731, ENSBTAG00000024240, ENSBTAG00000021151, ENSBTAG00000021301, ENSBTAG00000010672, ENSBTAG00000019854, ENSBTAG00000021632, ENSBTAG00000046547, ENSBTAG00000010284, ENSBTAG00000001908, ENSBTAG00000003439, ENSBTAG00000013113, ENSBTAG00000003746, ENSBTAG00000016265, ENSBTAG00000044160, ENSBTAG00000003072, ENSBTAG00000019759, ENSBTAG00000006463, ENSBTAG00000034193, ENSBTAG00000038058,…	387	887	15461	2.02682	0.00309698	0.00103339	0.0140136
CC	GO:0005829	cytosol	48	11.2412	3.89324e-05	ENSBTAG00000003362, ENSBTAG00000000362, ENSBTAG00000034366, ENSBTAG00000003887, ENSBTAG00000012251, ENSBTAG00000015924, ENSBTAG00000021752, ENSBTAG00000027722, ENSBTAG00000020935, ENSBTAG00000020873, ENSBTAG00000016265, ENSBTAG00000013162, ENSBTAG00000012519, ENSBTAG00000006765, ENSBTAG00000019759, ENSBTAG00000011397, ENSBTAG00000019349, ENSBTAG00000015683, ENSBTAG00000016038, ENSBTAG00000003825,…	387	1025	15461	1.87087	0.0114196	0.0028672	0.0518796
CC	GO:0043209	myelin sheath	14	3.27869	5.27603e-05	ENSBTAG00000008731, ENSBTAG00000015663, ENSBTAG00000001908, ENSBTAG00000013113, ENSBTAG00000006759, ENSBTAG00000012586, ENSBTAG00000006227, ENSBTAG00000013208, ENSBTAG00000013162, ENSBTAG00000017889, ENSBTAG00000019156, ENSBTAG00000006463, ENSBTAG00000021976, ENSBTAG00000002829	387	141	15461	3.96676	0.0154442	0.0031081	0.0703002
CC	GO:0045254	pyruvate dehydrogenase complex	4	0.936768	0.000148754	ENSBTAG00000010709, ENSBTAG00000018261, ENSBTAG00000021724, ENSBTAG00000001908	387	5	15461	31.9607	0.0429366	0.00728759	0.198089
CC	GO:0005777	peroxisome	9	2.10773	0.000163776	ENSBTAG00000024240, ENSBTAG00000012519, ENSBTAG00000004178, ENSBTAG00000009061, ENSBTAG00000031295, ENSBTAG00000003718, ENSBTAG00000019625, ENSBTAG00000008648, ENSBTAG00000003746	387	63	15461	5.70727	0.047169	0.00687877	0.218072
CC	GO:0005832	chaperonin-containing T-complex	4	0.936768	0.00115959	ENSBTAG00000017889, ENSBTAG00000019156, ENSBTAG00000014233, ENSBTAG00000002829	387	9	15461	17.756	0.289848	0.0418822	1.53459
CC	GO:0005654	nucleoplasm	51	11.9438	0.00165983	ENSBTAG00000018423, ENSBTAG00000016563, ENSBTAG00000008401, ENSBTAG00000003338, ENSBTAG00000021752, ENSBTAG00000012391, ENSBTAG00000001908, ENSBTAG00000027722, ENSBTAG00000009498, ENSBTAG00000019759, ENSBTAG00000007489, ENSBTAG00000002086, ENSBTAG00000011666, ENSBTAG00000014021, ENSBTAG00000018186, ENSBTAG00000004269, ENSBTAG00000004118, ENSBTAG00000026995, ENSBTAG00000014316, ENSBTAG00000015509,…	387	1310	15461	1.55534	0.387408	0.0529948	2.18985
CC	GO:0042645	mitochondrial nucleoid	6	1.40515	0.00270656	ENSBTAG00000003072, ENSBTAG00000008577, ENSBTAG00000015038, ENSBTAG00000008386, ENSBTAG00000016368, ENSBTAG00000013113	387	39	15461	6.14629	0.550454	0.0768391	3.54793
CC	GO:0005730	nucleolus	27	6.32319	0.00514341	ENSBTAG00000018423, ENSBTAG00000011596, ENSBTAG00000006970, ENSBTAG00000000362, ENSBTAG00000003239, ENSBTAG00000008170, ENSBTAG00000006909, ENSBTAG00000007802, ENSBTAG00000008545, ENSBTAG00000003072, ENSBTAG00000013162, ENSBTAG00000011266, ENSBTAG00000010760, ENSBTAG00000002827, ENSBTAG00000033304, ENSBTAG00000021592, ENSBTAG00000003399, ENSBTAG00000003495, ENSBTAG00000020281, ENSBTAG00000011198,…	387	605	15461	1.78293	0.781555	0.129156	6.64233
CC	GO:0005737	cytoplasm	98	22.9508	0.00877033	ENSBTAG00000016644, ENSBTAG00000008731, ENSBTAG00000002075, ENSBTAG00000006970, ENSBTAG00000008403, ENSBTAG00000010549, ENSBTAG00000014750, ENSBTAG00000019251, ENSBTAG00000003338, ENSBTAG00000012251, ENSBTAG00000021087, ENSBTAG00000008293, ENSBTAG00000020477, ENSBTAG00000034885, ENSBTAG00000004777, ENSBTAG00000009498, ENSBTAG00000020735, ENSBTAG00000015277, ENSBTAG00000004064, ENSBTAG00000007489,…	387	3109	15461	1.25931	0.925627	0.194712	11.0782
CC	GO:0009986	cell surface	17	3.98126	0.00947294	ENSBTAG00000025424, ENSBTAG00000007101, ENSBTAG00000004869, ENSBTAG00000008849, ENSBTAG00000025035, ENSBTAG00000016857, ENSBTAG00000021830, ENSBTAG00000008140, ENSBTAG00000006161, ENSBTAG00000012586, ENSBTAG00000005339, ENSBTAG00000012855, ENSBTAG00000019759, ENSBTAG00000006665, ENSBTAG00000003165, ENSBTAG00000001382, ENSBTAG00000038048	387	332	15461	2.04568	0.939665	0.194255	11.9147
CC	GO:0005634	nucleus	91	21.3115	0.0106672	ENSBTAG00000008731, ENSBTAG00000002279, ENSBTAG00000023279, ENSBTAG00000004688, ENSBTAG00000003532, ENSBTAG00000003362, ENSBTAG00000007648, ENSBTAG00000010549, ENSBTAG00000034366, ENSBTAG00000007689, ENSBTAG00000016328, ENSBTAG00000020935, ENSBTAG00000006901, ENSBTAG00000016265, ENSBTAG00000034885, ENSBTAG00000008545, ENSBTAG00000013162, ENSBTAG00000004777, ENSBTAG00000019187, ENSBTAG00000020735,…	387	2873	15461	1.26541	0.957732	0.202266	13.3198
CC	GO:0016607	nuclear speck	9	2.10773	0.0109466	ENSBTAG00000011266, ENSBTAG00000033304, ENSBTAG00000011596, ENSBTAG00000002279, ENSBTAG00000026995, ENSBTAG00000015572, ENSBTAG00000007802, ENSBTAG00000011198, ENSBTAG00000020935	387	121	15461	2.97155	0.961111	0.194643	13.6455
CC	GO:0002199	zona pellucida receptor complex	3	0.702576	0.015757	ENSBTAG00000017889, ENSBTAG00000019156, ENSBTAG00000002829	387	8	15461	14.9816	0.99077	0.253853	19.0787
CC	GO:0071013	catalytic step 2 spliceosome	7	1.63934	0.0195171	ENSBTAG00000018423, ENSBTAG00000002086, ENSBTAG00000026995, ENSBTAG00000005726, ENSBTAG00000021580, ENSBTAG00000006114, ENSBTAG00000009389	387	85	15461	3.29007	0.997016	0.289671	23.1036
CC	GO:0005903	brush border	5	1.17096	0.0219453	ENSBTAG00000021151, ENSBTAG00000002075, ENSBTAG00000000745, ENSBTAG00000004072, ENSBTAG00000021538	387	43	15461	4.64545	0.998564	0.304875	25.6035
CC	GO:0005759	mitochondrial matrix	9	2.10773	0.0233907	ENSBTAG00000010709, ENSBTAG00000024240, ENSBTAG00000004118, ENSBTAG00000018261, ENSBTAG00000021724, ENSBTAG00000030335, ENSBTAG00000008386, ENSBTAG00000002685, ENSBTAG00000012586	387	139	15461	2.58675	0.999072	0.307527	27.0556
CC	GO:0005801	cis-Golgi network	4	0.936768	0.0318809	ENSBTAG00000007442, ENSBTAG00000020180, ENSBTAG00000001977, ENSBTAG00000008862	387	28	15461	5.70727	0.999929	0.379917	35.0696
CC	GO:0005874	microtubule	9	2.10773	0.0382645	ENSBTAG00000017889, ENSBTAG00000018196, ENSBTAG00000005012, ENSBTAG00000019156, ENSBTAG00000014689, ENSBTAG00000019822, ENSBTAG00000016368, ENSBTAG00000013761, ENSBTAG00000002829	387	153	15461	2.35005	0.99999	0.421941	40.5499
CC	GO:0016020	membrane	32	7.49415	0.0443862	ENSBTAG00000018423, ENSBTAG00000006970, ENSBTAG00000017164, ENSBTAG00000019854, ENSBTAG00000000754, ENSBTAG00000027722, ENSBTAG00000013113, ENSBTAG00000009389, ENSBTAG00000003746, ENSBTAG00000016265, ENSBTAG00000005339, ENSBTAG00000006665, ENSBTAG00000006463, ENSBTAG00000016368, ENSBTAG00000016038, ENSBTAG00000003043, ENSBTAG00000020315, ENSBTAG00000016457, ENSBTAG00000005726, ENSBTAG00000015541,…	387	902	15461	1.41733	0.999998	0.455992	45.4005
CC	GO:0043005	neuron projection	8	1.87354	0.0445331	ENSBTAG00000009498, ENSBTAG00000019349, ENSBTAG00000004869, ENSBTAG00000015924, ENSBTAG00000009995, ENSBTAG00000013761, ENSBTAG00000014127, ENSBTAG00000007439	387	130	15461	2.45852	0.999999	0.442501	45.5123
CC	GO:0005741	mitochondrial outer membrane	6	1.40515	0.0453763	ENSBTAG00000019692, ENSBTAG00000007689, ENSBTAG00000001288, ENSBTAG00000011198, ENSBTAG00000013113, ENSBTAG00000010485	387	78	15461	3.07315	0.999999	0.434927	46.1497
CC	GO:0030424	axon	7	1.63934	0.0638246	ENSBTAG00000002988, ENSBTAG00000021151, ENSBTAG00000002075, ENSBTAG00000016457, ENSBTAG00000000362, ENSBTAG00000015924, ENSBTAG00000000745	387	113	15461	2.47483	1	0.540786	58.4829
CC	GO:0030141	secretory granule	4	0.936768	0.0685476	ENSBTAG00000005339, ENSBTAG00000005724, ENSBTAG00000000988, ENSBTAG00000012586	387	38	15461	4.20536	1	0.553221	61.1894
CC	GO:0043197	dendritic spine	4	0.936768	0.0685476	ENSBTAG00000021151, ENSBTAG00000014958, ENSBTAG00000016457, ENSBTAG00000011461	387	38	15461	4.20536	1	0.553221	61.1894
CC	GO:0031090	organelle membrane	4	0.936768	0.0685476	ENSBTAG00000005668, ENSBTAG00000001992, ENSBTAG00000010265, ENSBTAG00000014127	387	38	15461	4.20536	1	0.553221	61.1894
CC	GO:0044297	cell body	4	0.936768	0.0685476	ENSBTAG00000017889, ENSBTAG00000004869, ENSBTAG00000019156, ENSBTAG00000002829	387	38	15461	4.20536	1	0.553221	61.1894
CC	GO:0005794	Golgi apparatus	20	4.68384	0.0709197	ENSBTAG00000016563, ENSBTAG00000001523, ENSBTAG00000044194, ENSBTAG00000001333, ENSBTAG00000015554, ENSBTAG00000015195, ENSBTAG00000021245, ENSBTAG00000013793, ENSBTAG00000020661, ENSBTAG00000020180, ENSBTAG00000006666, ENSBTAG00000016169, ENSBTAG00000000555, ENSBTAG00000011397, ENSBTAG00000000782, ENSBTAG00000020482, ENSBTAG00000008862, ENSBTAG00000039662, ENSBTAG00000002829, ENSBTAG00000021857	387	528	15461	1.51329	1	0.552336	62.4864
CC	GO:0009331	glycerol-3-phosphate dehydrogenase complex	2	0.468384	0.0730484	ENSBTAG00000016296, ENSBTAG00000009770	387	3	15461	26.6339	1	0.5503	63.6159
CC	GO:0009925	basal plasma membrane	3	0.702576	0.0804253	ENSBTAG00000017266, ENSBTAG00000000745, ENSBTAG00000006161	387	19	15461	6.30804	1	0.573821	67.2916
CC	GO:0048471	perinuclear region of cytoplasm	15	3.51288	0.0811509	ENSBTAG00000016457, ENSBTAG00000003362, ENSBTAG00000014724, ENSBTAG00000010971, ENSBTAG00000008849, ENSBTAG00000016265, ENSBTAG00000015195, ENSBTAG00000008648, ENSBTAG00000004777, ENSBTAG00000013793, ENSBTAG00000020661, ENSBTAG00000009292, ENSBTAG00000021975, ENSBTAG00000016368, ENSBTAG00000007335	387	369	15461	1.62402	1	0.564921	67.6339
CC	GO:0016529	sarcoplasmic reticulum	3	0.702576	0.0879348	ENSBTAG00000012519, ENSBTAG00000002313, ENSBTAG00000002006	387	20	15461	5.99264	1	0.583513	70.678
